# Supplementary material for: Effectiveness of a Web-Based Self-Help Program for Suicidal Thinking in an Australian Community Sample: Randomized Controlled Trial
Source: PubMed Central journal article supplement (PMC5830610; doi:10.2196/jmir.8595), 2018-02-14
Supplement: jmir_v20i2e15_app2.pdf [file jmir_v20i2e15_app2.pdf]

Multimedia Appendix 2. Estimated marginal means (s.e.) from MMRM for primary and secondary outcomes at each time point for the intervention condition (LwDT) estimated from mixed-model repeated measures analyses.

|                               | Living with Deadly Thoughts (intervention) |                   |              |              | Living Well (control) |                   |              |              | Condition × time effect |           |              |
|-------------------------------|--------------------------------------------|-------------------|--------------|--------------|-----------------------|-------------------|--------------|--------------|-------------------------|-----------|--------------|
|                               | Baseline                                   | Post-intervention | 6 months     | 12 months    | Baseline              | Post-intervention | 6 months     | 12 months    | F                       | df        | p            |
|                               | n = 207                                    | n = 109           | n = 69       | n = 68       | n = 211               | n = 117           | n = 76       | n = 73       |                         |           |              |
| <b>Primary outcome</b>        |                                            |                   |              |              |                       |                   |              |              |                         |           |              |
| Severity (C-SSRS)             | 15.68 (0.21)                               | 13.14 (0.42)      | 12.14 (0.56) | 12.43 (0.55) | 14.85 (0.22)          | 13.00 (0.41)      | 11.98 (0.53) | 11.33 (0.53) | 0.89                    | 3, 182.56 | 0.445        |
| <b>Secondary outcomes</b>     |                                            |                   |              |              |                       |                   |              |              |                         |           |              |
| <b>Suicidality</b>            |                                            |                   |              |              |                       |                   |              |              |                         |           |              |
| Ideation (C-SSRS)             | 3.11 (0.08)                                | 2.43 (0.15)       | 2.02 (0.18)  | 2.06 (0.19)  | 3.00 (0.08)           | 2.16 (0.15)       | 1.99 (0.18)  | 1.69 (0.19)  | 0.75                    | 3, 182.81 | 0.523        |
| Behaviour (C-SSRS)            | 1.42 (0.12)                                | 0.87 (0.13)       | 1.10 (0.15)  | 0.87 (0.17)  | 1.43 (0.12)           | 1.02 (0.13)       | 1.04 (0.14)  | 1.07 (0.16)  | 0.59                    | 3, 191.69 | 0.622        |
| Ideation (SIDAS)              | 28.03 (0.71)                               | 21.48 (1.04)      | 17.41 (1.53) | 16.38 (1.39) | 25.37 (0.70)          | 20.41 (1.02)      | 18.88 (1.48) | 15.99 (1.36) | 1.44                    | 3, 174.14 | 0.232        |
| Reasons for living (BRFL)     | 37.8 (0.79)                                | 38.01 (1.02)      | 39.28 (1.23) | 37.66 (1.20) | 37.42 (0.78)          | 37.01 (1.00)      | 36.86 (1.18) | 36.17 (1.17) | 0.70                    | 3, 181.00 | 0.553        |
| Burdensomeness (INQ)          | 25.69 (0.68)                               | 22.93 (0.84)      | 21.07 (1.10) | 19.26 (1.02) | 24.56 (0.68)          | 21.23 (0.82)      | 20.12 (1.05) | 19.84 (0.99) | 0.95                    | 3, 175.58 | 0.418        |
| Belongingness (INQ)           | 28.06 (0.50)                               | 25.79 (0.72)      | 24.46 (1.00) | 24.83 (0.95) | 28.26 (0.49)          | 27.08 (0.70)      | 24.85 (0.95) | 24.53 (0.92) | 0.63                    | 3, 184.53 | 0.596        |
| Capability (ACSS)             | 10.63 (0.31)                               | 11.01 (0.40)      | 11.06 (0.44) | 10.43 (0.46) | 10.79 (0.31)          | 10.82 (0.40)      | 11.14 (0.43) | 10.92 (0.45) | 0.49                    | 3, 172.01 | 0.689        |
| <b>Symptomatology</b>         |                                            |                   |              |              |                       |                   |              |              |                         |           |              |
| Depression (CES-D)            | 40.82 (0.67)                               | 33.05 (1.12)      | 31.22 (1.49) | 30.9 (1.40)  | 39.72 (0.66)          | 32.58 (1.09)      | 29.35 (1.41) | 31.68 (1.36) | 0.63                    | 3, 188.13 | 0.594        |
| Hopelessness (BHS)            | 13.11 (0.34)                               | 11.26 (0.51)      | 9.90 (0.69)  | 9.40 (0.65)  | 12.54 (0.33)          | 9.85 (0.50)       | 9.20 (0.65)  | 9.24 (0.63)  | 0.61                    | 3, 188.75 | 0.609        |
| Anxiety (GAD-7)               | 13.40 (0.35)                               | 11.73 (0.50)      | 11.65 (0.59) | 9.88 (0.59)  | 13.14 (0.35)          | 11.17 (0.49)      | 10.23 (0.56) | 11.29 (0.57) | 3.95                    | 3, 191.75 | <b>0.009</b> |
| Panic (PHQ-Panic)             | 3.03 (0.15)                                | 2.70 (0.20)       | 2.87 (0.24)  | 2.56 (0.25)  | 3.10 (0.15)           | 2.68 (0.20)       | 2.20 (0.23)  | 2.39 (0.24)  | 1.75                    | 3, 193.00 | 0.159        |
| Rumination (RRS)              | 27.21 (0.42)                               | 26.48 (0.54)      | 25.75 (0.65) | 25.9 (0.63)  | 26.60 (0.42)          | 26.00 (0.53)      | 24.52 (0.62) | 24.10 (0.61) | 0.81                    | 3, 183.64 | 0.491        |
| Alcohol (AUDIT-C)             | 3.13 (0.21)                                | 2.88 (0.22)       | 3.11 (0.24)  | 2.71 (0.27)  | 3.02 (0.20)           | 3.06 (0.22)       | 3.20 (0.23)  | 3.27 (0.26)  | 1.78                    | 3, 162.25 | 0.153        |
| Sleep (ISI)                   | 15.44 (0.41)                               | 13.60 (0.58)      | 13.46 (0.71) | 12.11 (0.68) | 15.26 (0.41)          | 14.16 (0.57)      | 13.96 (0.68) | 13.37 (0.66) | 0.95                    | 3, 183.79 | 0.418        |
| <b>Quality of life</b>        |                                            |                   |              |              |                       |                   |              |              |                         |           |              |
| Physical health (SF-12-PHS)   | 40.14 (0.45)                               | 19.31 (0.61)      | 52.28 (0.52) | 52.12 (0.54) | 41.19 (0.45)          | 40.14 (0.45)      | 51.91 (0.52) | 51.88 (0.54) | 0.90                    | 3, 416.00 | 0.443        |
| Mental health (SF-12-MHS)     | 35.89 (0.41)                               | 49.40 (0.85)      | 53.58 (0.79) | 53.93 (0.76) | 36.21 (0.41)          | 49.70 (0.84)      | 52.97 (0.79) | 53.67 (0.75) | 0.29                    | 3, 416.00 | 0.835        |
| Physical functioning (WHODAS) | 40.98 (1.29)                               | 33.95 (1.76)      | 34.55 (2.21) | 31.2 (2.05)  | 39.05 (1.28)          | 34.13 (1.72)      | 33.13 (2.17) | 32.92 (2.00) | 0.99                    | 3, 171.73 | 0.399        |

All values are estimated marginal mean (s.e.), from mixed-model repeated measures analyses. ACSS, Acquired Capability for Suicide Scale; AUDIT-C = Alcohol Use Disorders Identification Test Consumption; BHS, Burns Hopelessness Scale; BRFL, Brief Reasons for Living Scale; C-SSRS, Columbia Suicide Severity Rating Scale; CES-D, Center for Epidemiologic Studies Depression Scale; GAD-7 = 7-item Generalized Anxiety Disorder scale; INQ, Interpersonal Needs Questionnaire; ISI, Insomnia Severity Index; PHQ-Panic, panic syndrome subscale of the Brief Patient Health Questionnaire; RRS, Rumination Response Scale; SF12-MCS, Short Form-12 Mental Health Composite Scale; SF-12-PHS, Short Form-12 Physical Health Composite Scale; SIDAS, Suicidal Ideation Attributes Scale; WHODAS, World Health Organization Disability Assessment Schedule.
